# Supplementary material for: AMOC-emulator M-AMOC1.0 for uncertainty assessment of future projections
Source: Copernicus journal article supplement (doi:10.5194/gmd-2016-79), 2016-05-17
Supplement: Supplementary file [file gmd-2016-79-EC2-supplement.pdf]

## Response to anonymous Referee #1

We thank Reviewer 1 for the interesting and extensive comments on the manuscripts. Below we will provide a detailed response to all individual comments.

*I don't understand the reasoning for why you generate 100 reasonable fits and then select only the 10 best fits (P7 L15). Firstly, this emulator/box-model should be cheap to run, so why choose such small numbers? Surely ensembles of order 10,000 or 100,000 are more reasonable. Secondly, the choice of 10 best fits seems to narrow the ranges of several parameters (e.g. V4, F1, h1). By doing this you rule out large regions of parameter space that give perfectly reasonable fits, and could behave differently under different forcing scenarios. If the primary aim is to assess uncertainty in AMOC projections I would expect to see a rigorous analysis of the uncertainty. By discarding large areas of parameter space uncertainty will certainly be underestimated.*

**Thanks for raising this valid point. Our aim here is not to provide an uncertainty assessment of AMOC projections, it is to provide a method with which one could do this, as for example done in the manuscript by Bakker et al. under review in GRL, now also pointed out in the last line of the main manuscript (lines 1-2 page 13) “The AMOC-emulator is a valuable tool to study the uncertainty in GCM-based AMOC projections, such as the one recently being performed on the results from the AMOCMIP project (Bakker et al., 2016).” The assessment referred to here is based on multiple GCMs, decreasing the need for a large number of AMOC-emulators for a single GCM.**

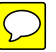

**With regard to the point that the AMOC-emulator is cheap and could thus be run for tens or even hundreds of thousands of times. This is very true, however, it takes many time steps and iterations to find a single reasonable fit. We have now included the following description to the manuscript (line 30 page 8 to line 2 page 9) “To provide an idea of the computational expenses of the model we provide a back of the envelope calculation. This shows that a single run over all scenarios takes  $10^5$  time steps which are done in about 5 seconds. You need on the order of 400 iterations (in which parameter values are perturbed) to find a single reasonable fit, resulting in approximately half an hour to calculate a single reasonable fit on a normal desktop computer.” This shows that by using more powerful computers and or running in parallel the number of reasonable fits could be enhanced, but it shows that 10,000 to 100,000 reasonable fits is ambitious nonetheless.**

*In the four scenarios not seen by the emulator (Fig. 8) the behavior of UVic is clearly not captured in two cases (lower left and upper right). There are no confidence intervals plotted (or computed as far as I can tell), but I believe the GCM would lie well outside 2 standard errors in those two cases. Therefore, the GCM would still need to be run for any untested scenario. I would not trust the emulator in its current form.*

**We don't agree with the general notion given by the reviewer. Firstly, it is important to realize that the values given in figure 8 are anomalies with respect to the time series given in figure 7. Thus even the largest mismatch between GCM and AMOC-emulator ( $\sim 1-2\text{Sv}$  in lower left panel) is 'only' a mismatch of 10-20%. We have added an objective assessment of the predictive power of the AMOC-emulator by comparing the results with a null-model that assumes that the emulator has no predictive power; it doesn't know if an additional forcing on top of the ones used in the tuning procedure would further increase or decrease the AMOC and would thus result in zero anomalies. This assessment shows that in three out of four cases the AMOC-emulator has substantial predictive power. We discuss this assessment in the manuscript (lines 20-30 page 11) “This is quantified by comparing the AMOC-emulator results with a null-model**

that assumes an AMOC-emulator with zero skill, meaning that it simply reproduces the original calibration data. The results from these experiments are shown as anomalies relative to the original scenario, the original being RCP8.5-GIS for RCP8.5x0.5-GIS, RCP8.5x1.5-GIS and RCP8.5-GISx1.5, and RCP4.5-GIS for RCP4.5-GISRCP8.5x1.5. We find that for large changes in the GHG forcing the Uvic-based AMOC-emulators are well capable of predicting the AMOC evolution of UVic in terms of sign and amplitude and perform better than the null-model (upper panels Fig. 8). For large changes in the applied GIS melt forcing the picture is more complex (lower panels Fig. 8). A strong increase in GIS melt under a low GHG scenario shows an excellent performance of the AMOC-emulator and a RSME that is much lower than for the null-model (RCP4.5-GISRCP-8.5x1.5 in Fig. 8), but for the high GHG scenario, a 50% increase in GIS melt leads to a deterioration of the fit between UVic and AMOC-emulator with consequently a larger RSME than that provided by the null-model (RCP8.5-GISx1.5 in Fig. 8). The latter shows that the UVic-based AMOC-emulators tend to overestimate the impact of GIS melt on the AMOC strength under high-end GHG scenarios. Summarizing, in all four cases the emulator predicts the correct sign of the AMOC response to changes in the forcings, and in three out of four cases the predictive power of the AMOC-emulator is better than of the null-model.”. Nonetheless, it is important to acknowledge that using an emulator will introduce a new type of error in any assessment, pointed out by the following text in the manuscript (lines 5-7 page 12) “It is clear that using an AMOC-emulator introduces a new type of uncertainty into AMOC projections, however, for which level of added uncertainty an AMOC-emulator is still useful is a question that is difficult to address.”

*On multidecadal timescales the emulator is plagued by sensitivity to surface temperature oscillations. These seem to have arisen from the addition of the atmospheric boxes to the ocean box model published by Zickfeld et al., 2004. Can the authors confirm that this is the case, and if so can they control this sensitivity, e.g. by introducing a damping/mixing term?*

The multidecadal AMOC oscillations result from the UVic-based regional temperature forcings of the AMOC-emulator and thus in turn to internal variability of UVic. Zickfeld et al. (2004) applied highly idealized linear temperature increases of global temperature, thus not including any multi-decadal variability. On the contrary, in our approach we directly use regional GCM-based temperature time series to force the AMOC-emulator. In this way the forcing not only takes into account the GCMs global climate sensitivity, but also mechanisms like polar amplification etc. that cause regional temperature change differences. This method also introduces any multi-decadal internal variability that might exist in a GCM into the AMOC-emulator when expressed in regional temperature time series. We acknowledge this feature, but do not see it as an issue.

*If the authors have good reason to retain this behavior they need to test the sensitivity to the phase of the variability. For all of the scenarios, the chosen start date (2006) appears to be shortly after a peak in the strong multidecadal variability, so the AMOC is preconditioned to decline at this time. Under all scenarios the AMOC in the ‘best’ emulators appear to decline faster than the UVic model. Consequently, the SA tuning and the cost function used may be adversely affected by this multidecadal variability.*

Indeed, following from the usage of the Stommel model to emulate the AMOC, multi-decadal temperature variability and its phasing impact the projected AMOC changes, in the AMOC-emulator, in UVic and most likely also in reality. Perhaps the AMOC response in the AMOC-emulator to regional temperature changes is too direct (as mentioned in the manuscript) and thus the importance of multi-decadal variability overestimated, but we don't see this as a major issue. It seems to us that the years before 2006 represent in fact a time of relatively weak AMOC, not

strong, thus preconditioning the AMOC-emulator to a somewhat weaker response to global change. We don't agree with the notion of the reviewer that the decline in the emulators is faster than in UVic, they seem very similar to us. Finally, multi-decadal AMOC variability only impacts the absolute value of the cost function, not the resulting optimal fits.

*On centennial timescales the emulator (as currently presented) does not capture crucial features of the AMOC response to the forcing (Fig. 7). In particular I would draw attention to the RCP4.5 scenarios, in which the GCM exhibits a strong reduction followed by a steady recovery. The emulator fails to identify either the timing or amplitude of the AMOC minimum and it fails to identify the recovery phase. In addition it appears to show signs of a recovery phase under RCP8.5 when UVic shows none. The authors state (P9 L28) that the fit can be improved, but that this would entail a higher overall cost function for the SA tuning method. Is this indicative of a poor choice of cost function? Does it mean that the box model should be tuned separately for each scenario?*

**The failure of the AMOC emulator to capture the slight recovery of the AMOC under RCP4.5 is indeed an issue and shows the limitations of the simple box model to capture all complex feedbacks in the GCM. Indeed, as mentioned in the manuscript, the AMOC-emulator does allow for an AMOC recovery under RCP4.5, but that would mean a large deterioration of the fit of the AMOC emulator to the AMOC in RCP8.5 and thus it would increase the value of the cost function, for which reason this solution is not found through this approach. It is an interesting point if the AMOC-emulator should be tuned separately for each scenario. We added the following to the manuscript to cover this issue (lines 23-33 page 10) “It is also worth noting that the fit for an individual simulation could be improved, for instance the AMOC-emulator does allow for a partial AMOC recovery as UVic shows for RCP4.5, but such an AMOC-emulator is not found through the SA tuning methodology in this example, because it would degrade the fit for the other scenarios and thus lead to an overall higher cost function.” More discussion on this topic follows in Sect. 4 of the manuscript (lines 7-13 page 12) “Another important consideration when using the AMOC-emulator is the spread in GCM climate forcing scenarios that is included in the tuning process. When using only a single climate change scenario, a better match can be obtained between the AMOC evolution given by the GCM and AMOC-emulator, however, the reliability of the AMOC-emulator will quickly decrease for different climate forcings. On the other hand, one could use a large number of climate change projections in the tuning process to obtain a lesser fit for individual scenarios, but an AMOC-emulator that is applicable to a much larger range of climate change scenarios. The best strategy to be followed strongly depends on the research question in mind.”**

*A far more substantial summary is required. For example, the emulator's limitations need to be clearly stated (and whether/how the authors think these can be addressed). For what purposes are the emulator suitable in its current form, and for what purposes might it be useful subject to further work? With the current analysis, I disagree with the statement that “the UVic-based AMOC-emulator captures well the overall characteristics of the multi-centennial response of the AMOC”.*

**Thanks for this comment. We agree that a more substantial and clear discussion is needed to make clear what the model can and cannot do. We have added the following to the discussion section (lines 1-22 page 12) “Overall, the predictive power of the AMOC-emulator is reasonable when one considers the simplicity of the AMOC box model, but for forcing scenarios that are increasingly far away from the forcings that are used in tuning the AMOC-emulator, the predictive power decreases. A large advantage of using a physics-based AMOC-emulator that is tuned with large climate forcings, over the use of for instance a statistical AMOC-emulator, is that it projects the point after which the AMOC collapses and switches to an off state, as this is an integral part of the physics of the Stommel model. It is clear that using an AMOC-emulator**

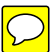

introduces new uncertainty into AMOC projections, however, for which level of added uncertainty an AMOC-emulator is still useful is a question that is difficult to address. Another important consideration when using the AMOC-emulator is the spread in GCM climate forcing scenarios that is included in the tuning process. When using only a single climate change scenario, a better match can be obtained between the AMOC evolution given by the GCM and AMOC-emulator, however, in this case the reliability of the AMOC-emulator will quickly decrease for different climate forcings. On the other hand, one could use a large number of climate change projections in the tuning process to obtain a lesser fit for individual scenarios, but an AMOC-emulator that is applicable to a much larger range of climate change scenarios. The best strategy to be followed strongly depends on the research question in mind. The assumptions behind the AMOC-emulator presented here, limit it to projecting AMOC changes on multi-decadal and larger timescales. Therefore, the applied GCM-based climate forcings and AMOC strength time series should best be filtered to exclude high frequency variability. Moreover, an AMOC-emulator that is tuned to specific GIS melt experiments is likely not applicable to experiments in which melt water is applied to a different geographical region or with a different seasonal cycle. This is not to say that the presented AMOC-emulator framework cannot equally be applied to other sources of melt water input. Finally, many processes that are known to impact the AMOC are not considered in the AMOC-emulator, for instance the impact of winds, gyre circulation, Southern Ocean upwelling or deep water formation outside of the North Atlantic (see Sect. 1). If such processes would prove to dominate the AMOC response to future climate change, a different AMOC box model should be considered that places emphasis on that particular process.”

*Minor comments:-*

*Page 3 Line 12: Prescribed FW fluxes: F1 and F2 are tuned parameters. I would have expected these to vary as a function of the forcing/climate. What is the justification for fixing them?*

**This part was not sufficiently clear in the manuscript and has now been updated. The total freshwater fluxes F1 and F2 are not part of the tuning procedure, but F01 and F02 (the combined wind-driven oceanic and atmospheric meridional freshwater fluxes for the reference state are). The text should have read (line 18 page 4) “Freshwater fluxes  $F_{01}$ ,  $F_{02}$  and coefficients  $h_1$  and  $h_2$  are included in the tuning procedure (Tab. 2)”**

*Page 5 Line 10: What you also fail to consider are nonlinearities between these parameters. Co-varying the parameters in Tables 1 and 2 could yield very different behaviours.*

**The parameter fitting method we employ, simulated annealing, randomly varies the individual parameters, thus considering (although not explicitly) both linear and nonlinear relationships between parameters. Moreover, by including Figure 6 we perform a first order test to see whether relationships exist between parameters, which indeed is the case for several of them.**

*Page 5 Line 30: *algorith* > *algorithm**

**Thank you, it has been corrected.**

*Page 6 Line 4: I find the arbitrary choice of +/- 200% rather strange. What is the justification for this?*  
**We agree that this choice is arbitrary. Our approach has been to take this arbitrary value, perform the analysis and then to analyze whether or not all parameter values that resulted from the fitting procedure were well within the +/-200% range (see also figure 6). From this it was decided to keep the +/-200% value. This point is clarified by adding (lines 14-15 page 7) “The appropriateness of this arbitrary range of initial parameter values is later verified by ensuring that all final parameter values are well within the initial range.”**

*Page 6 Line 8: analogues > analogous*  
**Thank you, it has been corrected.**

*Check typesetting in Tables (e.g. Table 1 column 2)*  
**Thank you, typesetting is checked.**

*Table 1: (typo) dependend > dependent*  
**Thank you, it has been corrected.**

*Check typesetting on Figure 8: it appears corrupted.*  
**Thank you, typesetting is checked.**

*Figure 4 caption: (typo) relatvie > relative*  
**Thank you, it has been corrected.**

*Figure 8 caption: (typo) calculate > calculated*  
**Thank you, it has been corrected.**

*Figure 8 caption: (typo) righth > right*  
**Thank you, it has been corrected.**

## Response to anonymous Referee #2

**We thank Reviewer 2 for the interesting and extensive comments on the manuscripts. Below we will provide a detailed response to all individual comments.**

### *1 General Comments*

#### *1.1 Introduction*

*The introduction does not sufficiently reflect the state of the literature on AMOC and in particular not on conceptual models such as the Stommel-Model to study it.*

*Our understanding of AMOC dynamics has advanced considerably over the last years thanks to ongoing observations e.g. in the Rapid array (see Srokosz & Byrden, Science 2015). In addition a recent studies has suggest that the AMOC might already be in decline (Rahmstorf et al. 2015). While of course not directly relevant for the emulator itself, such observational findings need to be discussed in an approach that emulate AMOC behaviour over the next centuries. This should also include a discussion of atmospheric imprints on the AMOC e.g. such as atmospheric blocking events. It should also allow to assess the performance of GCMs in relation to the observational record.*

**We cannot agree with the points raised above. We are presenting a new modeling framework in a journal for model development. As such, we agree that some insights as to why we think a new modeling framework is needed is called for, but a discussion of observed AMOC changes, AMOC fingerprints or the performance of GCMs in relation to the observational record does not seem appropriate in this journal and is beyond the scope of this paper..**

*Much more important though is the discussion in relation to the emulator approach taken. Stommel type models have been used since quite some time and might be able to capture key dynamics of the AMOC (e.g. bistability). However, they at the same time have faced a lot of criticism and alternative models describing AMOC behaviour exist. This is in particular related to the relevance of Southern Ocean upwelling reflected in a conceptual model by Gnanadesikan (1999) related to changes in the pycnocline depth. A dynamic that is completely missing in the Stommel approach.*

*This has been explored further in conceptual models and attempts exist to unify pycnocline and freshwater-feedback dynamics. In this context, the authors should consider the work of Sijp et al. (2012) that they may find helpful.*

*Another question directly relating to the physical plausibility of the Stommel model relates to the relationship of circulation strength and meridional density gradient in a geostrophic ocean. The authors should consider work by Gregoy & Tailleux (2010) that present a kinetic energy approach essential providing a physical explanation for the (empirically supported) meridional density gradient outlining the relevance of the Western Boundary Current in modelling AMOC dynamics.*

*These comments should not be seen as undermining the Stommel model approach taken here, but they need to be addressed. In short, the authors should show motivate their approach in the light of the most recent literature.*

**Thanks for pointing this out and we agree that a more thorough discussion of the pro's and con's of the used Stommel model is called for. An important caveat of using a Stommel model is that Southern Ocean upwelling, the role of Southern Hemisphere mid-latitude winds and other processes are neglected, a point that we have added to the discussion of this manuscript. Our choice to use the Stommel model was driven by two considerations. Firstly, to our knowledge no unified simple AMOC model exists and as such it is not clear if other models are better or worse than the Stommel model in relating surface temperature and freshwater flux changes to the AMOC strength. Secondly, the Stommel model allows for rather straightforward inclusion of temperature and freshwater forcings based on GCM simulations, while for other models like the ones mentioned above it is not clear to us how this could be done. Finally, it is important to note**

that we did not set out to construct a new simple model that describes the main dynamics of the AMOC, but rather to use an existing model and build a framework around it that can easily be applied to GCM climate change and AMOC projections.

Following the above, we have updated the introduction to read (lines 14-23 page 2) “At the center of our approach is the assumption that changes in AMOC strength are linearly related to changes in the Atlantic meridional density contrast. Since Stommel (1961) a large number of studies have provided evidence for an important role of the Atlantic meridional density contrast in driving AMOC changes (e.g. Rahmstorf, 1996; Gregory and Tailleux, 2011; Butler et al., 2016). Nonetheless, it neglects several important processes, like the role of Southern Ocean upwelling, winds and deep water formation (e.g. Gnanadesikan, 1999; de Boer et al., 2010) and a unified theory describing the fundamental mechanisms driving and sustaining the AMOC lacks to this date (Lozier, 2010). Using a Stommel model to emulate AMOC changes driven by surface temperature and freshwater forcings seems appropriate in the light of present-day knowledge and the apparent leading role of surface buoyancy changes in simulated future AMOC weakening (IPCC Climate Change, 2013). Moreover, the model is easy to use, interpreted and can be forced directly with GCM-based forcing fields. Nonetheless, the processes that have been omitted and the simplicity of the model should be considered when interpreting the results.” To the discussion section we have added (lines 20-24 page 12) “...many processes that are known to impact the AMOC are not considered in the AMOC-emulator, for instance the impact of winds, gyre circulation, Southern Ocean upwelling or deep water formation outside of the North Atlantic (see Sect. 1). If such processes would prove to dominate the AMOC response to future climate change, a different AMOC box model should be considered that places emphasis on that particular process.”

### *1.2 The Emulator model*

*Here, the work dominantly builds on a previous model by Zickfeld et al. (2004) plus a representation of the Bjerknæs feedback. It does however not become sufficiently clear, why this addition will represent a substantial advancement. The authors show the differences in Fig. 9 and describe that this will represent a negative feedback on the AMOC dynamics. But it's not clear, if Figure 9 shows two sets calibrated individually (with and without atmospheric feedback) or just from the optimal parameter set with this feedback switched on and off. Therefore, I cannot judge if the conclusion drawn by the authors on the importance of the effect are due to their specific parameter set or not.*

*It would add merit, if the authors could show that the model including the Bjerknæs effect will in the end outperform the no-atmospheric feedback model in the fitting procedure. This would also justify, why there model is actually better than the one presented in Zickfeld (2004).*

**Thanks for providing this comment. Firstly, the main improvement with respect to the Zickfeld et al. (2004) model is that we provide a framework that allows one to use limited GCM AMOC and climate projections to tune an AMOC-emulator in order to perform an uncertainty analysis. The Zickfeld et al. (2004) approach used a full ~20.000yr long hysteresis simulation to tune their emulator, not feasible for most IPCC-type GCMs. Moreover, they did not force their emulator with GCM-based temperature changes or consider inter-GCM differences in regional temperature changes. Those are the features we see as most important changes with respect to earlier work, a view that is now better reflected in the introduction of the manuscript by (line 23 page 1 to line 3 page 2) “To this end we developed an AMOC-emulator framework. It entails a simple box model that uses physical relationships to represent the most important mechanisms and feedbacks that govern the AMOC’s response to changes in regional surface temperatures, freshwater fluxes and enhanced melting of the GIS. The AMOC-emulator can be forced by temperature and melt water fluxes from any GCM, and using AMOC time series the free**

parameters of the box model are tuned to mimic the GCM's AMOC sensitivity to future climate change.” and in later on in the introduction it reads (lines 11-13 page 2) “the approach described here is designed specifically to allow future studies in which a limited number of climate projections from multiple GCMs, limited in the simulated forcing scenarios and simulation length, to be combined into a Bayesian framework of century time-scale probabilistic AMOC projections.”

With respect to the added stabilizing Bjerkness feedback, it indeed appears from Figure 9 that it's impact is limited. Figure 9 shows results for the same parameter sets with this feedback switched on and off, allowing for a direct investigation of its impact. Nonetheless, we deem the model including this feedback more realistic. Moreover, the effect is non-negligible (lines 1-6 page 11) “The impact of including atmospheric meridional heat transport is a small, but non-negligible  $\sim 1\text{Sv}$  strengthening of the control state of the AMOC (not shown) and, more importantly, a slightly lower sensitivity to changes in radiative forcing and GIS melt (Fig. 9). This confirms our understanding of atmospheric meridional heat transport acting as a negative feedback to AMOC changes. The simulations with the atmospheric feedback included have on average a stronger AMOC by  $8.1 \pm 1.9\%$  ( $\mu \pm \sigma$ ; calculated over all 10 best fits and over all five forcing scenarios).”

*Furthermore, the model includes 5 atmospheric boxes. Why are 5 boxes needed and not 3 to resolve the meridional heat transport? I think that can be easily motivated and maybe I missed it. Maybe it's worth considering to restructure the approach by moving subsection 2.3 further up to discuss the setup of the atmospheric forcings.*

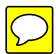

**Including high latitude atmospheric boxes allows us to have a closed energy budget and more realistic meridional atmospheric heat transport.**

**Thanks for the suggestion to rearrange this section. We have accordingly switched sections 2.2 and 2.3.**

*In this context, the authors should also reflect on the limitations of the model to reproduce transient AMOC changes that relate to the assumption of well-mixed density within the boxes. This might be in particularly relevant in relation to the Greenland freshwater input. Clearly, this represents an over-simplification and may substantially limit the capabilities of this approach to emulate transient behaviour (I'll further comment on this below).*

**Thanks for pointing this out. We fully agree that a box model can never resolve the complexities of the interaction between Greenland meltwater and the ocean. We have experimented with an additional tuning parameter to include the GCM dependent 'efficiency' of Greenland meltwater to impact the density of the North Atlantic ocean box, but decided against it since the current 7 tuning parameters already allow for sufficient freedom to tune an AMOC-emulator towards the AMOC sensitivity of a specific GCM.**

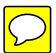

### *1.3 The tuning to complex model output*

*In the manuscript, the model is tuned to an EMIC model UVIC. I think that's generally no problem, but somehow contradicts the initial claims by the authors that this emulator could now be used to run larger ensembles. What is it exactly that the emulator provides that cannot be done with an EMIC?*

*In general terms, the strength of an emulator is it's capability to include projections from a range of different models. We have AMOC projections for several CMIP5 models, why is it not applied to those?*

*In addition, there are the AMOC sensitivity studies by Gregory et al. (2005) and Stouffer et al. (2006) that would provide enough runs to calibrate the model. Why isn't it applied to those runs?*

*In addition, the authors mention the AMOCMIP project. Can the emulator be applied to the AMOCMIP output?*



Thanks for these comments. It has become clear from the comments of the different reviewers that the aim of this manuscript is not sufficiently clear and we have changed the abstract, introduction and summary sections to improve on this. In this manuscript we want to describe a modeling framework that allows one to use limited GCM output to tune and force an AMOC box model that can in turn be used to perform uncertainty analysis. It is not the aim of this manuscript to provide future AMOC projections or provide such an uncertainty analysis. See also the responses provided above.

*I checked the project homepage and understood that the AMOCMIP will explicitly resolve different Greenland basins separately. Is that correct? If so, and following recent findings that it actually matters a lot for North Atlantic dynamics where the freshwater is actually applied, will this emulator be the best tool to reproduce these dynamics? Or should it maybe consist of a subpolar (Labrador Sea) and North Atlantic box? And/or should conceptual models of convection in marginal seas e.g. by Spall (2004) and Straneo (2009) be integrated?*

**Thanks for this question. Indeed the aim of the simulations in AMOCMIP is to provide 'realistic' Greenland melt scenarios and to apply those to IPCC-type climate change projections. This includes explicitly resolving spatial and seasonal differences in the meltwater flux. Such details cannot be captured by the AMOC-emulator. However, as described above, by tuning the AMOC-emulator to the forcings and AMOC projections of a specific GCM, we take into account the inter-GCM differences in the sensitivity of the AMOC to changes in temperature and freshwater.**

#### *1.4 Results*

*I've to admit I'm not impressed by the capabilities of the emulator in reproducing the model outcome. As apparent from Fig. 7, the emulator is systematically underestimating AMOC reduction for RCP4.5 and RCP8.5 no melt, while then over-estimating it for RCP8.5 plus GIS (maybe due to non-linearities kicking in here and timescale issues discussed above?). The authors discussion of this simply stating that "It is, however, to be expected that a box-model does not completely capture the behavior of the AMOC as simulated with a higher order climate model" is clearly insufficient. In particular, as there have been much simpler AMOC emulators around that actually perform much better (also and in particularly an AMOC recovery, e.g. Schleussner et al. 2014).*

**Thanks for pointing this out. We agree that there are limitations to the AMOC-emulator and that because of choices that have been made, it appears that previous emulator perform better. There are, however, a number of important things to take into consideration. Firstly, one could perform the tuning on a single GCM forcing scenario and the result will be a closer fit between GCM and emulator AMOC. However, when choosing that approach, one is limited to applying the emulator to forcing scenarios close to the one used for tuning. By using a larger number of scenario in the tuning process, the emulator can be used to test the AMOC for a much larger range of scenarios, albeit at the cost of having larger discrepancies between GCM and emulator. We have added text along these lines to the manuscript (lines 23-33 page 10) "It is also worth noting that the fit for an individual simulation could be improved, for instance the AMOC-emulator does allow for a partial AMOC recovery as UVic shows for RCP4.5, but such an AMOC-emulator is not found through the SA tuning methodology in this example, because it would degrade the fit for the other scenarios and thus lead to an overall higher cost function." More discussion on this topic follows in Sect. 4 of the manuscript (lines 7-13 page 12) "Another important consideration when using the AMOC-emulator is the spread in GCM climate forcing scenarios that is included in the tuning process. When using only a single climate change scenario, a much better match can be obtained between the AMOC evolution given by the GCM and AMOC-emulator, however, the reliability of the AMOC-emulator will quickly decrease for different climate forcings. On the other hand, one could use a large number of climate change projections in the tuning process to**

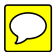

obtain a lesser fit for individual scenarios, but an AMOC-emulator that is applicable to a much larger range of climate change scenarios. The best strategy to be followed strongly depends on the research question in mind.”

Another issue to consider is the use of physics-based or statistical emulators. With a statistical AMOC emulator one could obtain better agreement between GCM and emulator, however, such a model cannot be used to extrapolate for larger forcings. With a physics-based AMOC-emulator one can have more confidence in the response to large forcings, for instance a complete AMOC shutdown, notwithstanding that also in this approach the uncertainty is likely to increase for forcings further away from those used for tuning. This is discussed in the final section of the updated manuscript (lines 1-8 page 12) “Overall, the predictive power of the AMOC-emulator is reasonable when one considers the simplicity of the AMOC box model, but forcing scenarios that are increasingly far away from the forcings that are used in tuning the AMOC-emulator, the predictive power decreases. A large advantage of using a physics-based AMOC-emulator that is tuned with larger large climate forcings, over the use of for instance a statistical AMOC-emulator, is that it projects the point after which the AMOC collapses and switches to an off state, as this is an integral part of the physics of the Stommel model. It is clear that using an AMOC-emulator introduces a new type of uncertainty into AMOC projections, however, for which level of added uncertainty an AMOC-emulator is still useful is a question that is difficult to address.”

*The apparent oscillations in the emulator arising from a “too direct response” of the emulator towards multi-decadal surface temperature oscillations also merits more discussion.*

The origin of the oscillations is already mentioned in the manuscript (lines 17-18 page 9) “The UVic-based surface temperature evolution exhibits multi-decadal to centennial oscillations that result from global climate variability originating from the Southern Ocean” and we do not deem it necessary to discuss the resulting AMOC oscillations in much detail as they are a feature of the forcing based on this particular climate model and not a feature of the AMOC-emulator. In the discussion section we have added some words describing the kind of temperature forcings that are appropriate to use (lines 15-17 page 12) “The assumptions behind the AMOC-emulator presented here, limit it to projecting AMOC changes on multi-decadal and larger timescales. Therefore, the applied GCM-based climate forcings and AMOC strength time series should be filtered to exclude high resolution variability.”

*It is even worse for the predictions in Fig. 8. First of all, the figure is not well-labelled (no y-axis labeling, panels not clearly distinguishable, and what is given by the numbers 5,1,5?) and that there is no such thing as a top-middle panel for only two boxes.*

The conversion of the figure must have gone wrong at some point because the points raised by the reviewer are difficult to understand looking at the figures we have in the manuscript. We will ensure that the figures are correct in the next version.

*For none of the panels, the model actually captures key features. It fails to capture the bumps in the top-left and bottom right, and for the two other panels, it gets it wrong completely. I cannot agree to the author’s conclusions that “Overall, the predictive power of the AMOC-emulator is good for reasonable forcing scenarios when one considers the simplicity of the model.”*

We don't agree with the general notion given by the reviewer. Firstly, the AMOC-emulator is not designed to emulator decadal AMOC fluctuations as simulated by the GCM. As mentioned in the manuscript, those results from internal climate variability mostly originating from the Southern Ocean and it is not to be expected that the emulator captures those. Moreover, the focus of the AMOC emulator is on multi-decadal to multi-centennial scales, something that is now specifically

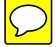

mentioned in the discussion (see reply above).

Furthermore, it is important to realize that the values given in figure 8 are anomalies with respect to the time series given in figure 7. Thus even the largest mismatch between GCM and AMOC-emulator ( $\sim 1-2\text{Sv}$  in lower left panel) is 'only' an mismatch of 10-20%. We have added an objective assessment of the predictive power of the AMOC-emulator by comparing the results with a null-model that assumes that the emulator has no predictive power; it doesn't know if an additional forcing on top of the ones used in the tuning procedure would further increase or decrease the AMOC and would thus result in zero anomalies. This assessment shows that in three out of four cases the AMOC-emulator has substantial predictive power. We discuss this assessment in the manuscript (lines 20-30 page 11) "This is quantified by comparing the AMOC-emulator results with a null-model that assumes an AMOC-emulator with zero skill, meaning that it simply reproduces the original calibration data. The results from these experiments are shown as anomalies relative to the original scenario, the original being RCP8.5-GIS for RCP8.5x0.5-GIS, RCP8.5x1.5-GIS and RCP8.5-GISx1.5, and RCP4.5-GIS for RCP4.5-GISRCP8.5x1.5. We find that for large changes in the GHG forcing the Uvic-based AMOC-emulators are well capable of predicting the AMOC evolution of UVic in terms of sign and amplitude and perform better than the null-model (upper panels Fig. 8). For large changes in the applied GIS melt forcing the picture is more complex (lower panels Fig. 8). A strong increase in GIS melt under a low GHG scenario shows an excellent performance of the AMOC-emulator and a RSME that is much lower than for the null-model (RCP4.5-GISRCP-8.5x1.5 in Fig. 8), but for the high GHG scenario, a 50% increase in GIS melt leads to a deterioration of the fit between UVic and AMOC-emulator with consequently a larger RSME than that provided by the null-model (RCP8.5-GISx1.5 in Fig. 8). The latter shows that the UVic-based AMOC-emulators tend to overestimate the impact of GIS melt on the AMOC strength under high-end GHG scenarios. Summarizing, in all four cases the emulator predicts the correct sign of the AMOC response to changes in the forcings, and in three out of four cases the predictive power of the AMOC-emulator is better than of the null-model." Nonetheless, it is important to acknowledge that using an emulator will introduce a new type of error in any assessment, pointed out by the following text in the manuscript (lines 5-7 page 12) "It is clear that using an AMOC-emulator introduces a new type of uncertainty into AMOC projections, however, for which level of added uncertainty an AMOC-emulator is still useful is a question that is difficult to address."

### 1.5 Summary

*Generally, I miss a section that reflects on the limitations and short-comings of the approach taken, given in particular the apparent limitations in reproducing the EMIC results. Furthermore, an outlook of where this can be applied and what its specific strengths are compared to other approaches should be included.*

Thanks for this comment. We agree that a more substantial and clear discussion is needed to make clear what the model can and cannot do. We have added the following to the discussion section (lines 1-22 page 12) "Overall, the predictive power of the AMOC-emulator is reasonable when one considers the simplicity of the AMOC box model, but for forcing scenarios that are increasingly far away from the forcings that are used in tuning the AMOC-emulator, the predictive power decreases. A large advantage of using a physics-based AMOC-emulator that is tuned with large climate forcings, over the use of for instance a statistical AMOC-emulator, is that it projects the point after which the AMOC collapses and switches to an off state, as this is an integral part of the physics of the Stommel model. It is clear that using an AMOC-emulator introduces new uncertainty into AMOC projections, however, for which level of added uncertainty an AMOC-emulator is still useful is a question that is difficult to address. Another important consideration when using the AMOC-emulator is the spread in GCM climate forcing

scenarios that is included in the tuning process. When using only a single climate change scenario, a better match can be obtained between the AMOC evolution given by the GCM and AMOC-emulator, however, in this case the reliability of the AMOC-emulator will quickly decrease for different climate forcings. On the other hand, one could use a large number of climate change projections in the tuning process to obtain a lesser fit for individual scenarios, but an AMOC-emulator that is applicable to a much larger range of climate change scenarios. The best strategy to be followed strongly depends on the research question in mind. The assumptions behind the AMOC-emulator presented here, limit it to projecting AMOC changes on multi-decadal and larger timescales. Therefore, the applied GCM-based climate forcings and AMOC strength time series should best be filtered to exclude high resolution variability. Moreover, an AMOC-emulator that is tuned to specific GIS melt experiments is likely not applicable to experiments in which melt water is applied to a different geographical region or with a different seasonal cycle. This is not to say that the presented AMOC-emulator framework cannot equally be applied to other sources of melt water input. Finally, many processes that are known to impact the AMOC are not considered in the AMOC-emulator, for instance the impact of winds, gyre circulation, Southern Ocean upwelling or deep water formation outside of the North Atlantic (see Sect. 1). If such processes would prove to dominate the AMOC response to future climate change, a different AMOC box model should be considered that places emphasis on that particular process.”

## Response to anonymous Referee #3

**We thank Reviewer 3 for the interesting and extensive comments on the manuscripts. Below we will provide a detailed response to all individual comments.**

### *2 The model formulation*

#### *2.1 On using a conceptual model*

*I don't understand why this kind of ad-hoc box model is preferred. One would resort to Stommel's box model if one knows almost nothing about AMOC. Stommel's model was just conceptual, whose sole purpose is to get very rough ideas on how AMOC might work, and is not designed for the kind of quantitative modeling that the present authors pursue.*

*Stommel's box model was presented in 1961, and we know a lot more today. I would think that a simple dynamical model like Gnanadesikan's (1999, Science vol. 283, pp. 2077–) is much better because even uncertain parameters are based on (that is, constrained by) clearly-identified dynamics. In contrast, some of the present authors' "parameterizations" aren't adequately defensible; they are based on hand-waving arguments. For example, how can one defend the parameterization that the AMOC strength is proportional to the interspheric surface-density difference? We know a lot better than that.*

*Perhaps even better, the models of Schloesser et al. (2014, Prog. Oceanogr. Vol. 120, pp. 154–) and McCreary et al. (2016, Prog. Oceanogr. vol. 123, pp. 46–) provide constraints among integral quantities, such as AMOC strength, thermocline depth, and meridional density difference, and hence can be utilized as a "box model". Those constraints are derived as solutions to dynamical equations rather than assumed on the basis of hand-waving arguments.*

*In short, I don't see any advantage today in utilizing an old conceptual model for quantitative prediction.*

#### *2.2 AMOC proportional to interhemispheric density difference?*

*The authors say that "the assumption that the meridional Atlantic density contrast between the North Atlantic and the South Atlantic is the first order driver of the AMOC" is debatable, but I think that's off the mark. The current wisdom is that the Southern-Ocean winds (and perhaps vertical diffusivity) are the first-order driver. They cite Butler et al. (2016) as the other side of the "debate" but Butler et al. do not argue that the surface meridional density gradient "drives" the AMOC. They just use density integrated twice in the vertical as a "diagnostic" of the AMOC.*

*It is clear from ocean GCM studies that the meridional density gradient is not the first order driver of AMOC. When the sea-surface density is restored toward a prescribed profile in an ocean-only GCM and windstress is changed in the Southern Ocean, the AMOC strength changes roughly linearly to the windstress. See Toggweiler et al. (1995, Deep-Sea Research vol. 42, pp.477–) and the series of studies that follow. This is evidence enough that the interhemispheric density difference does not drive AMOC.*

*Of course, this evidence is based on ocean-only models, and it is possible that the interhemispheric density difference is correlated with the AMOC strength through atmospheric feedbacks, but to use a one-to-one correspondence like (1) needs justification based on atmosphere-ocean coupled dynamics.*

*By the way, I found that Butler et al. (2016) still use the traditional hand-waving parameterization  $p_x=L_x / p_y=L_y$ . See Schloesser et al. (2012, Prog. Oceanogr. Vol. 101, pp. 33–) for a better parameterization based a lot more on dynamics.*

**Thanks for describing in detail your view on conceptual models and the drivers of the AMOC. Indeed there is a wide variety of models of different complexity that describe (some aspect of) the AMOC, some more based on dynamic considerations than others, some including parameters**

that are more easily constrained by observations than others. In this study we have chosen to use one of the simplest and most established of such models around which to build our emulator framework, this is done for various reasons: i) it can easily be forced by temperature and Greenland melt outputs from a GCM; ii) it is easy to implement; iii) very fast to run; iv) easy to understand/diagnose the results; v) has several free parameters that can be tuned towards the behavior of a GCM in terms of the sensitivity of the AMOC to changes in heat and freshwater fluxes. We acknowledge that a different model could have been chosen, perhaps one that would turn out to perform better, however, we are not able to try every single one of them so that remains unknown.

We do agree that when using the Stommel model to make the connection between changes in temperature and freshwater and changes in the AMOC strength implies that certain processes are not taken into account, like the role of changes in Southern Ocean winds, upwelling and deep water formation when projecting future changes in the AMOC. This is now more clearly described in the manuscript with the following in the introduction (lines 14-23 page 2) “At the center of our approach is the assumption that changes in AMOC strength are linearly related to changes in the Atlantic meridional density contrast. Since Stommel (1961) a large number of studies have provided evidence for an important role of the Atlantic meridional density contrast in driving AMOC changes (e.g. Rahmstorf, 1996; Gregory and Tailleux, 2011; Butler et al., 2016). Nonetheless, this model neglects several important processes, like the role of Southern Ocean upwelling, winds and deep water formation (e.g. Gnanadesikan, 1999; de Boer et al., 2010) and a unified theory describing the fundamental mechanisms driving and sustaining the AMOC lacks to this date (Lozier, 2010). Using a Stommel model to emulate AMOC changes driven by surface temperature and freshwater forcings seems appropriate in the light of present-day knowledge and the apparent leading role of surface buoyancy changes in simulated future AMOC weakening (IPCC Climate Change, 2013). Moreover, the model is easy to use, interpreted and can be forced directly with GCM-based forcing fields. Nonetheless, the processes that have been omitted and the simplicity of the model should be considered when interpreting the results.” and the following in the discussion section (lines 20-24 page 12) “...many processes that are known to impact the AMOC are not considered in the AMOC-emulator, for instance the impact of winds, gyre circulation, Southern Ocean upwelling or deep water formation outside of the North Atlantic (see Sect. 1). If such processes would prove to dominate the AMOC response to future climate change, a different AMOC box model should be considered that places emphasis on that particular process.”

However, we do not agree with the reviewers view that it is now well established how the AMOC works, what drives future AMOC changes and that the Stommel model has been shown to be wrong. Although we are not experts in the field of conceptual AMOC models and we do not plan to provide a discussion of all literature on the subject, we are not aware of any such consensus in the field. As becomes clear from the references cited above by the reviewer and by the references in the manuscript, many things are still debated and the Stommel model, that is the relationship between AMOC strength and meridional density differences, is still widely used to discuss the mechanisms and stability of the AMOC in complex GCMs.

### *3 Tuning and validation*

#### *3.1 GCMs for tuning*

*Why aren't multiple coupled GCMs used to tune the parameters? Do the authors recommend that the AMOC-emulator be tuned differently for each model?*

The present manuscript aims to describe a modelling framework that can be used in combination with any GCM. Since the AMOC sensitivity to changes in heat and freshwater fluxes is strongly

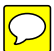

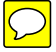

**GCM-dependent, we indeed recommend that the AMOC-emulator is tuned separately for every GCM to reflect these differences.**

*The emulator is based on equations that represent physical processes in the real world. Then, if at all possible, the parameters should be tuned on the basis of reality. Granted that there is not enough data for the deep ocean. Then the second best thing is the publicly-available collections of coupled GCM runs. I think that studies have indicated that a multi-model ensemble is usually better than a single model to mimic reality. So, the tuned parameters would be more likely better if they are based on multiple models.*

**We agree that ideally one would tune the free parameters within bounds provided by observational data. However, since it is such a highly simplified and conceptual model, the parameters are not easily obtained from observations even if that data would be abundant. For future applications, we indeed recommend that a large number of AMOC-emulators is used, tuned towards different GCMs, in order to provide a range of parameter values that is hopefully as close to reality as possible.**

### 3.2 Variables for tuning

*The variables (salinity, ocean temperature, etc.) of the emulator should be compared with those from the GCM. It is possible that the state of the emulator is very different from that of the GCM even when the AMOC strength  $m$  agrees.*

*On a more basic note, have the authors made sure that all the variables of the emulator take reasonable values? I don't think it would be okay if, say, salinity takes a value of -100 psu even if the value of  $m$  is reasonable!*

*If the atmosphere and ocean states aren't realistic, how can we trust the emulator?*

*One approach to cope with this problem would be to include other variables than AMOC strength in the cost function. Another approach would be to compare various variables between the runs of the tuned model and those of the GCMs (part of validation). I think both are necessary.*

**Thanks for providing this interesting idea. First of all, we fully agree that one has to make sure that the values for salinity and temperature in the different parts of the box model are realistic. This has been checked. Indeed one could include the comparison between GCM and AMOC-emulator temperatures and salinity in the tuning procedure. However, there does not seem to be a reason why an AMOC emulator that has temperatures and salinities that are closer to the GCMs, would perform better in terms of the AMOC behavior, in fact the tuning of the parameters would very much be steered by getting the right temperatures and salinities and less so by the AMOC, thus likely deteriorating the capabilities of the AMOC-emulator in terms of mimicking the AMOC in the GCM. Since our focus is purely on providing a computational efficient method to provide uncertainty estimates of GCM AMOC projections, we deem the current approach most suited.**

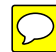

### 3.3 Models for validation

*Moreover, I think the tuned emulator should be validated against another set of different models. Otherwise the validation isn't robust.*

**As discussed above, the sensitivity of the AMOC differs from one GCM to the next, therefore the AMOC-emulator should be tuned separately for every GCM and thus not be validated with results from a different GCM.**

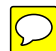

*I also wonder if an ensemble of runs are necessary for the GCM (UVic) for tuning and validation. For*

*example, there is only one run for each case in Figure 8, but doesn't the AMOC strength differ from realization to realization? I don't know how chaotic the GCM is (because it uses a low-degree-of-freedom atmospheric model), but isn't the reality more or less chaotic?*

**Thanks for this question. This is indeed an interesting point. There are two points to this question. Firstly, like mentioned by the reviewer, Uvic is a low resolution GCM that is known to have less variability than higher resolution and complexity models. However, for high and low resolution models, the forced response of the AMOC to strong changes in temperature and freshwater is much stronger than internal variability, which is on the order of 1Sv on decadal and longer timescales. There are indications from observations that in the real world AMOC variability is substantially larger, however, those time series are currently too short to make any robust statements about this and, furthermore, this does not impact our GCM-based methodology.**

#### *4 Forcing*

*I may be missing something, but it's not clear to me what forces the emulator. The solar flux  $S$  seems constant in time (Table 1), but then how is the increase in green-house gas represented?*

**Thanks for this comment. The section on AMOC-emulator forcings describes the way we use GCM output to force the AMOC-emulator. Indeed the solar flux is constant in time. The GCM regional temperature changes, including the impact of increased green-house gasses and all feedbacks, are included in the AMOC-emulator through the so-called 'total atmosphere effect' parameter. A parameter of the atmosphere, "a temporal and spatial varying parameter that effectively combines atmospheric emissivity, the greenhouse effect and all other processes included in a GCM that cause regional temperatures to differ from global temperature changes". This way it is ensured that the ocean is regionally forced by almost the same temperature changes as in the GCM. Furthermore, the AMOC-emulator is forced by the GCM-based  $F_{GIS}$  forcing.**

*If I understand it correctly, forces the model (equation 19) toward one particular GCM solution, but wouldn't it damp the emulator's variability? especially when the emulator is to simulate a state that is very different from the GCM state used for? Doesn't this amount to building the solution into the simulation?*

**The GCM-based regional temperatures that are used as forcing, are used in the tuning phase. If one would like to use the AMOC-emulator to simulate a temperature forcing that is different (as is done in the section "Predictive power of the UVic-based AMOC-emulator"), the changes in the 'total atmosphere effect' parameter can be changed accordingly.**

#### *5 Minor points: math notations*

*5.1 Arrays The authors define boldface math symbols to mean "arrays", but I recommend avoiding this unconventional convention. For example, a multiplication of two "arrays" can mean several different things in conventional mathematics. Equation (13) includes the multiplication of the arrays  $S$  and  $p$ , which is meant to represent  $(S1p1; S2p2; : : :)$ , which is hardly conventional.  $K$  and  $Ta$  have the same problem in (14). Also, equation (11) includes  $l=z$ , by which the authors mean  $(l=z1; l=z2; : : :)$ , but which is not widely used in math.*

#### *5.2 Subscripts*

*I recommend using an upright font for multi-character math symbols such as "start" and "gcm"; or avoiding them. In particular, the subscript "it" looks as if it represented two subscripts  $i$  and  $t$ . I recommend using a single-character subscript, such as "i1" or if you insist on multi-character subscript, you may want "it□1" using an upright font.*

**Thanks for pointing out the issues with math notations and subscripts. Indeed the notations that are used are confusing and in some places wrong. We have updated the manuscript following the**



## recommendations of the reviewer.

### *6 Point by point comments*

*Some of the following comments support my arguments above, some raise other concerns, and others point out minor, mostly editorial, problems. I wrote many of them as I read the manuscript for the first time, and as a result, they include some redundancy. I leave them as they are, because they often reflect difficulties or problems the reader may encounter as she reads the text.*

#### *6.0.1 p. 1, l. 19:*

*“due to climate sensitivity, polar amplification, GIS melt and model dependent sensitivity of the AMOC . . . ”—I’m confused. Doesn’t “climate sensitivity” include all the remaining items in the list? Why is it listed in parallel with the rest?*

**Thanks for pointing this out. Indeed taking climate sensitivity as the the global temperature change for a doubling of CO<sub>2</sub>, this term is mostly taken to include all other processes that are listed. However, in the model world this is not always the case. For instance, ice-sheet-climate interactions are mostly not considered and thus GIS melt not taken into account. Moreover, one can have the same climate sensitivity, but different polar amplification and the latter can result in a different AMOC response because of the sensitivity of the AMOC to latitudinal temperature differences. Why we prefer to list all of them separately in this context, is because GCMs differ in all those terms, and all those uncertainties can be tested individually with the AMOC-emulator.**

#### *6.0.2 p. 2, l. 5:*

*“(Rahmstorf and Willebrand, 1981)”—As the reference list indicates, this should probably be Rahmstorf and Willebrand (1995).*

**Thanks for pointing this out, it has been corrected.**

#### *6.0.3 p. 2, ll. 5 & 31:*

*“the so-called Bjercknes feedback”—Probably this is because I’m not much versed in climate research, but isn’t the “so-called Bjercknes feedback” restricted along the equator? A direct overturning circulation occurs connecting cooling in the eastern Pacific, say, and warming in the western Pacific only along the equator, where the Coriolis force vanishes, and the surface windstress associated with this zonal overturning circulation enhances the upwelling of sea water, which further lowers the sea-surface temperature in the eastern Pacific—a positive feedback, which is “the so-called Bjercknes feedback”.*

*The authors cite Rahmstorf and Willebrand (1995) for “the so-called Bjercknes feedback”, but Rahmstorf and Willebrand proposed a negative feedback due to heat transport within the atmosphere, I think.*

**Indeed this topic is somewhat confusing as indeed the Bjercknes feedback often refers to the feedback described by the reviewer, but this term (or Bjercknes compensation) is also used to describe the compensation between meridional heat transport by the ocean and atmosphere as first proposed by Bjercknes in 1964. The latter indeed provides a stabilizing or negative feedback to AMOC changes.**

#### *6.0.4 p. 2, l. 7:*

*“tuning a numbrer of free parameters”—They aren’t “free”. They represent specific physical processes and hence must be ultimately determined by physics, even though it’s in practice difficult to derive their values purely from physical principles.*

**The term 'free parameter' is used here to make the distinction between parameters that are prescribed and those that are not, or in other words, those that are part of the tuning process and**

those that are not. All of them represent physical processes and should (and often are) determined from observations.

6.0.5 p. 3, l. 12:

*Why is  $F$  prescribed? I would expect it to change according to the state of the climate system. What do IPCC-class coupled GCMs say about the change in  $F$  under global warming, for example? . . . but, later in the text, the authors say that  $F$  is related to the global atmospheric temperature (equation 12). So, it's not prescribed after all.*

**Thanks for pointing this out. The manuscript is not sufficiently clear on this topic and changes have been included for clarification.  $F_i$  consists of two parts (equation 12), a part that is fixed in time ( $F_{0i}$ ) and a part that is a function of global temperature changes ( $h_i \Delta T_{\text{glob}}$ ). Both  $F_i$  and  $h_i$  are part of the tuning process.**

6.0.6 Equations (3)–(10): *What does this “” mean? Is it a typo for “@”?*

**Thanks for pointing this out, we have updated the manuscript for clarity.**

6.0.7 Equation (11):

*State whether  $z$ 's are fixed, and if so, give their values here or refer the reader to a table or something.*

**The formulation now includes a clear notation showing that  $z$  is a function of  $i$  and a reference to Table 1 is given.**

6.0.8 Equation (12):

*$T_{\text{glob}}$  should be defined. (How is it computed from  $T_a$ ?)*

**This has been rewritten to read “global atmospheric surface temperature anomalies”.**

6.0.9 Equation (12):

*Give  $F_0$ 's their values here or refer the reader to a table or something.*

**This line now reads “Freshwater fluxes  $F_{01}$ ,  $F_{02}$  and coefficients  $h_1$  and  $h_2$  are included in the tuning procedure (Tab. 2).”**

6.0.10 Equation (13):

*I may be mistaken, but it seems that the  $T_a^4$  is the only nonlinear term. Doesn't it make sense if this term is linearized around a mean state?*

**Yes it could be, but we prefer to keep the current form.**

6.0.11 Equation (13):

*The solar flux  $S$  is a confusing notation. By the authors' own convention,  $S = (S_0; S_1; S_2; S_3; S_4)$ , which uses the same symbols as salinity.*

**Thanks for pointing this out, this is indeed confusing. The notation has been changed to read  $I_i$ .**

6.0.12 Equation (13):

*The solar flux  $S$  should be discussed right below equation (13). Does it depend on time? Table 1 suggests that it's constant in time but that should be stated explicitly. So, does the emulator solves only for annual averages?*

**The first line after equation 13 now reads “where  $\sigma$  is the Stefan Boltzmann constant and  $I_i$  and  $\alpha_i$  the latitude dependent yearly mean incoming shortwave radiation and planetary albedo, respectively (see Tab. 1 for details)”.**

6.0.13 Equation (13):

*Define this symbol precisely. (But I don't recommend this notation because a gradient of an array is a strange mathematical entity.)*

**Thanks for pointing this out. It should have been a Delta symbol.**

6.0.14 Equation (14):

*What does this "" mean? Is it a typo for "@"?*

**This has been corrected.**

6.0.15 Equation (14):

*State that  $H_a$  is defined to vanish at the northern and southern ends of the northernmost and southernmost boxes. (I guess they are so defined, right?)*

**The following has been added "Meridional heat fluxes are assumed zero at the northern and southern boundaries of the domain."**

6.0.16 p. 5, l. 15:

*I guess we need some discussion on other possible sets of tuning parameters. We have a vast range of possibilities. Then, how have we settled on these seven parameters? Have the authors tried other combinations of parameters?*

**We deem this discussed by the line (lines 25-27 page 6) "This selection of parameters is somewhat subjective, but it proved a good balance between, on the one hand, sufficient degrees of freedom to tune the AMOC emulator's behavior towards that of a specific GCM and, on the other hand, the efficiency to find optimal parameter fits."**

6.0.17 p. 5, l. 15:

*$F$  and  $h$  are related by equation (12), and so cannot be determined independently. Moreover, if you tune  $F$ , you can forget about equation (12) and don't need to consider  $h$ .*

**We apologize for the confusion that has arisen because of errors in the notation. This has been corrected in the text and figures.  $F_{01}$  and  $h_1$  are the parameters used in the tuning process. The former giving the steady state meridional freshwater transport by both the atmosphere and the wind driven ocean part, while the latter controls the changes in atmospheric transport as a function of global temperature changes.**

6.0.18 Equation (15):

*Why try to optimize  $m$  alone? It's conceivable that widely different states have similar  $m$  values. Because we have other variables like salinity, we could choose better sets of parameter values, if we include other variables in the cost function, couldn't we?*

**As discussed above, we don't think that including more variables in the tuning process would lead to a better behavior of the AMOC-emulator in terms of its capacity to mimic the GCMs AMOC sensitivity to changes in temperature and freshwater.**

6.0.19 Equation (15):

*I may well be mistaken, but it seems that the differential equations are linear in the tuning parameters and if so, the optimization problem on the new cost function ...is a quadratic function of the parameters and can be solved analytically, I think.*

**The optimization of the parameters cannot be solved analytically as the system is non-linear and includes 7 parameters that influence each other.**

6.0.20 Equation (16):

*The notation " $pstart(1 \square z)$ " is confusing because it looks as if  $pstart(z)$  were a function of  $z$ . Vectors*

customarily come after scalars, as in “ $(1 - z)p_{start}$ ”

**It has been changed.**

6.0.21 Step 1:

*I don't understand why we have to repeat this step. Why not choose values that are within the ranges in Table 2 in the first place? We can use a random variable whose PDF is uniform over the specified range for each parameter, can't we? I mean, if  $(1 - z)p_1$  is below the range, we can just use  $p_{1min}$  for the lower bound; that is, we can use  $U(\max((1 - z)p_1; p_{1min}); \min((1 + z)p_1; p_{1max}))$  without repetition. The same argument holds for the last part of Step 3.*

**The solution given by the referee will not always give the same results. More specifically, the  $p_{1min}$  and  $p_{1max}$  values would be used much more often than other values in case random values from outside of the range are often picked. Another solution would be to split  $z$  into  $z_{min}$  and  $z_{max}$  and adjust those values for every parameter to ensure that the randomly picked values are never outside of the imposed ranges. We don't think it matters which solution is picked.**

6.0.22 Equation (17):

*I may be missing something, but shouldn't (16) and (17) be written in parallel forms? If we write  $(1 - z)p$  for (16), then we should write  $(1 - it)p$  for (17). If we write  $p - itp$  for (17), we should write  $p - zp$  for (16). For a moment, I was confused with (17).*

**Thanks for pointing this out, using the same notation for both equations indeed improves readability.**

6.0.23 p. 7, l. 16:

*I think that efforts should be made to narrow the range of the parameter values. If parameters are widely different even though the cost function is similar, doesn't that suggest that the parameters aren't well tuned?*

*What about comparing variables other than  $m$  between the emulator and the GCM? Wouldn't that tell which parameter values are bad?*

*It seems that the authors have forgotten that there is only one reality.*

**Firstly, we assume the reviewer is pointing towards 'GCM reality' in this comment, since we do not aim to work towards a single parameter set that provides the closest resemblance to the real world AMOC, no matter how much we would like to do so. However, also when we are talking about using an emulator to mimic the complex AMOC behavior in a GCM, we do not expect that there is a single parameter set that provides the perfect match between GCM and emulator; because of the highly simplified nature of the emulator, it cannot be determined which parameter set is closest to 'GCM reality'.**

6.0.24 p. 7, l. 22:

*What is “RCP”? (I may have missed its definition given in the text.) Because how is determined is important, it may be helpful to give a bit more information here.*

**This line reads “RCP4.5 and RCP8.5 (Representative Concentration Pathways; Meinshausen et al., 2011)”, which we deem sufficient information, especially since in the context of testing the AMOC-emulator, the exact imposed climate forcings are only of secondary importance.**

6.0.25 Equation (19):

*Does the model really use the full time-series of  $T_{gcm}$ ? Or is that a long-term mean? State clearly how is  $T_{gcm}$  defined. If the emulator uses the full time-series, it may not be appropriate for other models or for other scenarios.*

**Thanks for pointing this out.  $T_{GCM}$  can in principle be of any temporal resolution. However, the**

model aims at resolving AMOC changes on decadal and longer timescales and as such, including high frequency variability in the temperature forcing could lead to misinterpretation of the results. We have added a discussion point in the final section of the manuscript to clarify the strengths and weaknesses of the AMOC-emulator (lines 15-17 page 12) “The assumptions behind the AMOC-emulator presented here, limit it to projecting AMOC changes on multi-decadal and larger timescales. Therefore, the applied GCM-based climate forcings and AMOC strength time series should be filtered to exclude high resolution variability.”.

6.0.26 p. 8, l. 2:

*“Note that the temperature forcing files need to be interpolated onto the temporal resolution used in the atmospheric component of the AMOC-emulator”*—Awkward in several counts.

1. *The interpolation draws the attention of the reader as if it were something noteworthy. Perhaps the results are sensitive to the method of interpolation? The reader would wonder.*

2. *Is the fact that the GCM data are saved in files noteworthy? (I mean, why mention the files at all?)*

3. *Despite this cautious tone, the interval at which the GCM data is saved is not indicated.*

*If the result is sensitive to the interpolation, give more details. If not, what about just saying, “The GCM variables are saved at an interval of XXX hours and interpolated on to the time steps of the AMOC-emulator”, something along the lines.*

**The line has been removed.**

6.0.27 p. 8, ll. 5–6:

*A similar problem. If interpolation is so noteworthy, give more details. If it’s not so big a deal, just say, “the GIS melt forcing is interpolated. . . .” instead of “Note that the GIS melt forcing needs to be interpolated. . . .”*

**The line has been removed.**

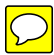

# AMOC-emulator framework M-AMOC1.0 for uncertainty assessment of future projections

Pepijn Bakker<sup>1,\*</sup> and Andreas Schmittner<sup>1</sup>

<sup>1</sup>College of Earth, Ocean and Atmospheric Sciences, Oregon State University, USA

\*Now at MARUM – Center for Marine Environmental Sciences, University of Bremen, Bremen, Germany

Correspondence to: Pepijn Bakker (pbakker@marum.de)

**Abstract.** State-of-the-science global climate models show that global warming is likely to weaken the Atlantic Meridional Overturning Circulation (AMOC). While such models are arguably the best tools to perform AMOC projections, they do not allow a comprehensive uncertainty assessment because of limited computational resources. Here we introduce the AMOC-emulator M-AMOC1.0, a model framework designed for probabilistic projections of multi-centennial time scales. M-AMOC1.0 uses complex climate model results to force and tune a box model of the AMOC. Box model parameters are adjusted using a simulated annealing procedure. We provide a detailed description of the AMOC box model and show how complex climate model output can be used to force and tune the box model. Finally, we provide an example based on simulations of future climate change including increased greenhouse-gas levels and enhanced melting of the Greenland Ice Sheet performed with the UVic climate model of intermediate complexity. Despite its simplicity, we show that this modeling framework can capture the first order response of the AMOC in UVic to climate change and thus provide a method that can in future studies be applied to existing and new climate change simulations to provide thorough uncertainty assessments.

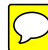

## 1 Introduction

The Atlantic Meridional Overturning Circulation (AMOC) is an important part of the climate system due to its effects on the transports of heat, salt, carbon, nutrients and other tracers. Projections consistently show a reduction of the AMOC due to future global warming (*IPCC Climate Change*, 2013), with the possibility of an irreversible transition to a shutdown state (Stommel, 1961; Stouffer et al., 2006), a prime example of a tipping point in the climate system (Lenton et al., 2008). Large ensemble simulations are necessary for probabilistic projections, policy relevant risk assessment of future emission scenarios and to assess the uncertainties of AMOC projections due to climate sensitivity, polar amplification, melting of the Greenland Ice Sheet (GIS) and model dependent sensitivity of the AMOC to such climatic changes. The high degree of complexity and spatial resolution of GCMs make them too computationally expensive to perform such an analysis and thus a model is needed that is much cheaper to run, but nonetheless captures important characteristics of the GCM's AMOC response to climate change.

To this end we developed an AMOC-emulator framework. It entails a simple box model that uses physical relationships to represent the most important mechanisms and feedbacks that govern the AMOC's response to changes in regional surface
